# Supplementary material
Source: Springer Nature journal article supplement (https://www.springermedizin.de/resource/supplementary/12874_2008_401_MOESM2_ESM.pdf/9434398)

## Colon

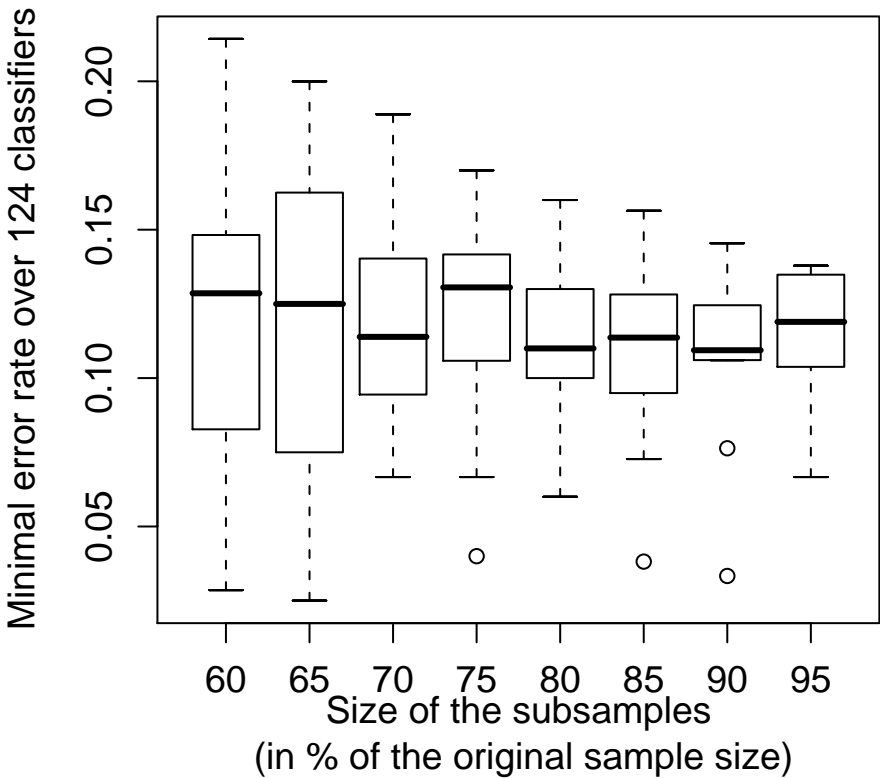

## Prostate

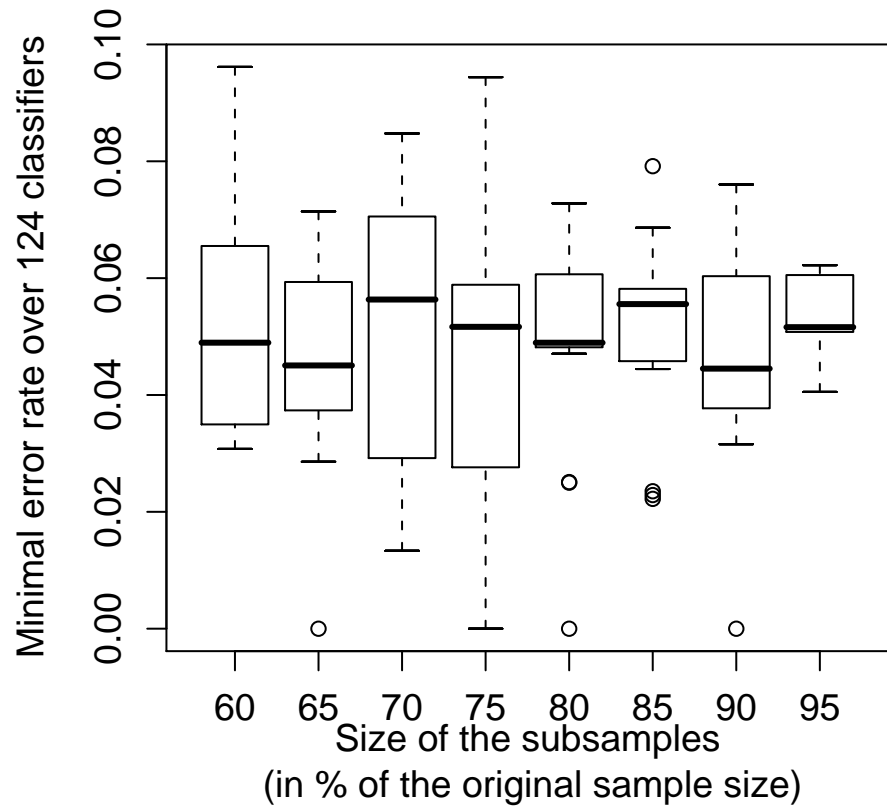

Supplement: MOESM2 [file 9434398]
